# Supplementary material for: Nanofibrillar hydrogel scaffolds from recombinant protein‐based polymers with integrin‐ and proteoglycan‐binding domains
Source: PubMed Central journal article supplement — J Biomed Mater Res A. 2016 Aug 16;104(12):3082–92. doi: 10.1002/jbm.a.35839 (PMC5129582; doi:10.1002/jbm.a.35839), 2016-08-16
Supplement: JBM-104-3082-s001.pdf [file JBM-104-3082-s001.pdf]

## Supporting Information

### **Nanofibrillar hydrogel scaffolds from recombinant protein-based polymers with integrin- and proteoglycan-binding domains**

Małgorzata K. Włodarczyk-Biegun,<sup>1\*</sup> Marc W. T. Werten,<sup>2\*</sup> Urszula Posadowska,<sup>1,3</sup>  
Ingeborg M. Storm,<sup>1</sup> Frits A. de Wolf,<sup>2</sup> Jeroen J. J. P. van den Beucken,<sup>4</sup>  
Sander C. G. Leeuwenburgh,<sup>4</sup> Martien A. Cohen Stuart,<sup>1</sup> Marleen Kamperman<sup>1</sup>

\*These authors contributed equally to this work.

<sup>1</sup> Physical Chemistry and Soft Matter, Wageningen University, Stippeneng 4,  
NL-6708 WE Wageningen, The Netherlands; [gosia.wlodarczyk-biegun@wur.nl](mailto:gosia.wlodarczyk-biegun@wur.nl);  
[inge.storm@wur.nl](mailto:inge.storm@wur.nl); [martien.cohenstuart@wur.nl](mailto:martien.cohenstuart@wur.nl); [marleen.kamperman@wur.nl](mailto:marleen.kamperman@wur.nl)

<sup>2</sup> Wageningen UR Food & Biobased Research, Bornse Weilanden 9,  
NL-6708 WG Wageningen, The Netherlands; [marc.werten@wur.nl](mailto:marc.werten@wur.nl); [frits.dewolf@wur.nl](mailto:frits.dewolf@wur.nl)

<sup>3</sup> Faculty of Materials Science and Ceramics, Department of Biomaterials,  
AGH University of Science and Technology, Al. A. Mickiewicza 30,  
30-059 Krakow, Poland; [uposadow@agh.edu.pl](mailto:uposadow@agh.edu.pl)

<sup>4</sup> Department of Biomaterials, Radboudumc, Philips van Leydenlaan 25,  
NL-6525 EX Nijmegen, The Netherlands; [jeroen.vandenbeucken@radboudumc.nl](mailto:jeroen.vandenbeucken@radboudumc.nl);  
[sander.leeuwenburgh@radboudumc.nl](mailto:sander.leeuwenburgh@radboudumc.nl)

**Correspondence to:** [marc.werten@wur.nl](mailto:marc.werten@wur.nl)

**Address:** Wageningen UR Food & Biobased Research,  
NL-6708 WG Wageningen, The Netherlands

**Phone:** +31 317 483683

**Fax:** +31 317 483011

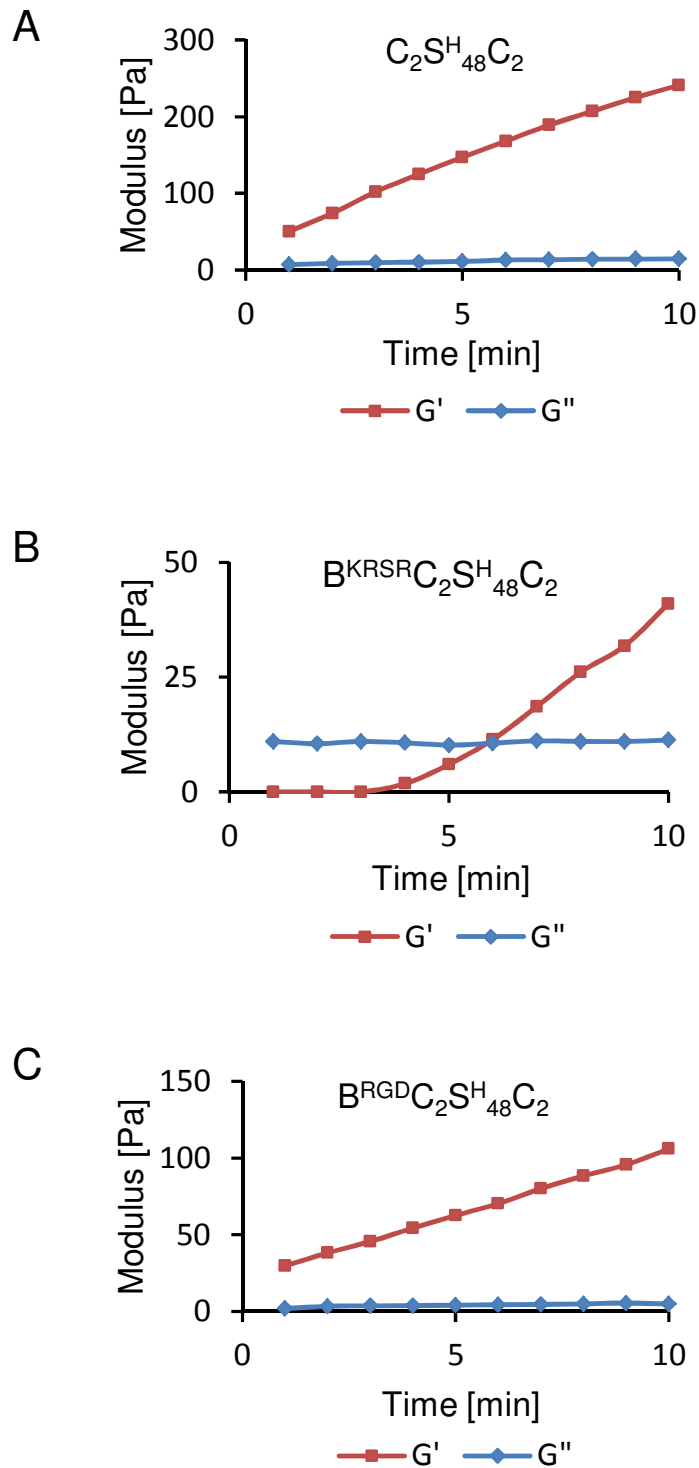

**FIGURE 1.** Rheometry of 2% gels of  $C_2S^{H}_{48}C_2$  (A),  $B^{KRSR}C_2S^{H}_{48}C_2$  (B) and  $B^{RGD}C_2S^{H}_{48}C_2$  (C). Development of storage and loss modulus as a function of time during the first 10 min of the measurement. Gelation occurs when the storage modulus ( $G'$ ) exceeds the loss modulus ( $G''$ ). The time involved in titration of the pH to 7.4, which induces self-assembly, and loading of the sample into the rheometer prior to the actual measurement is less than 5 min.

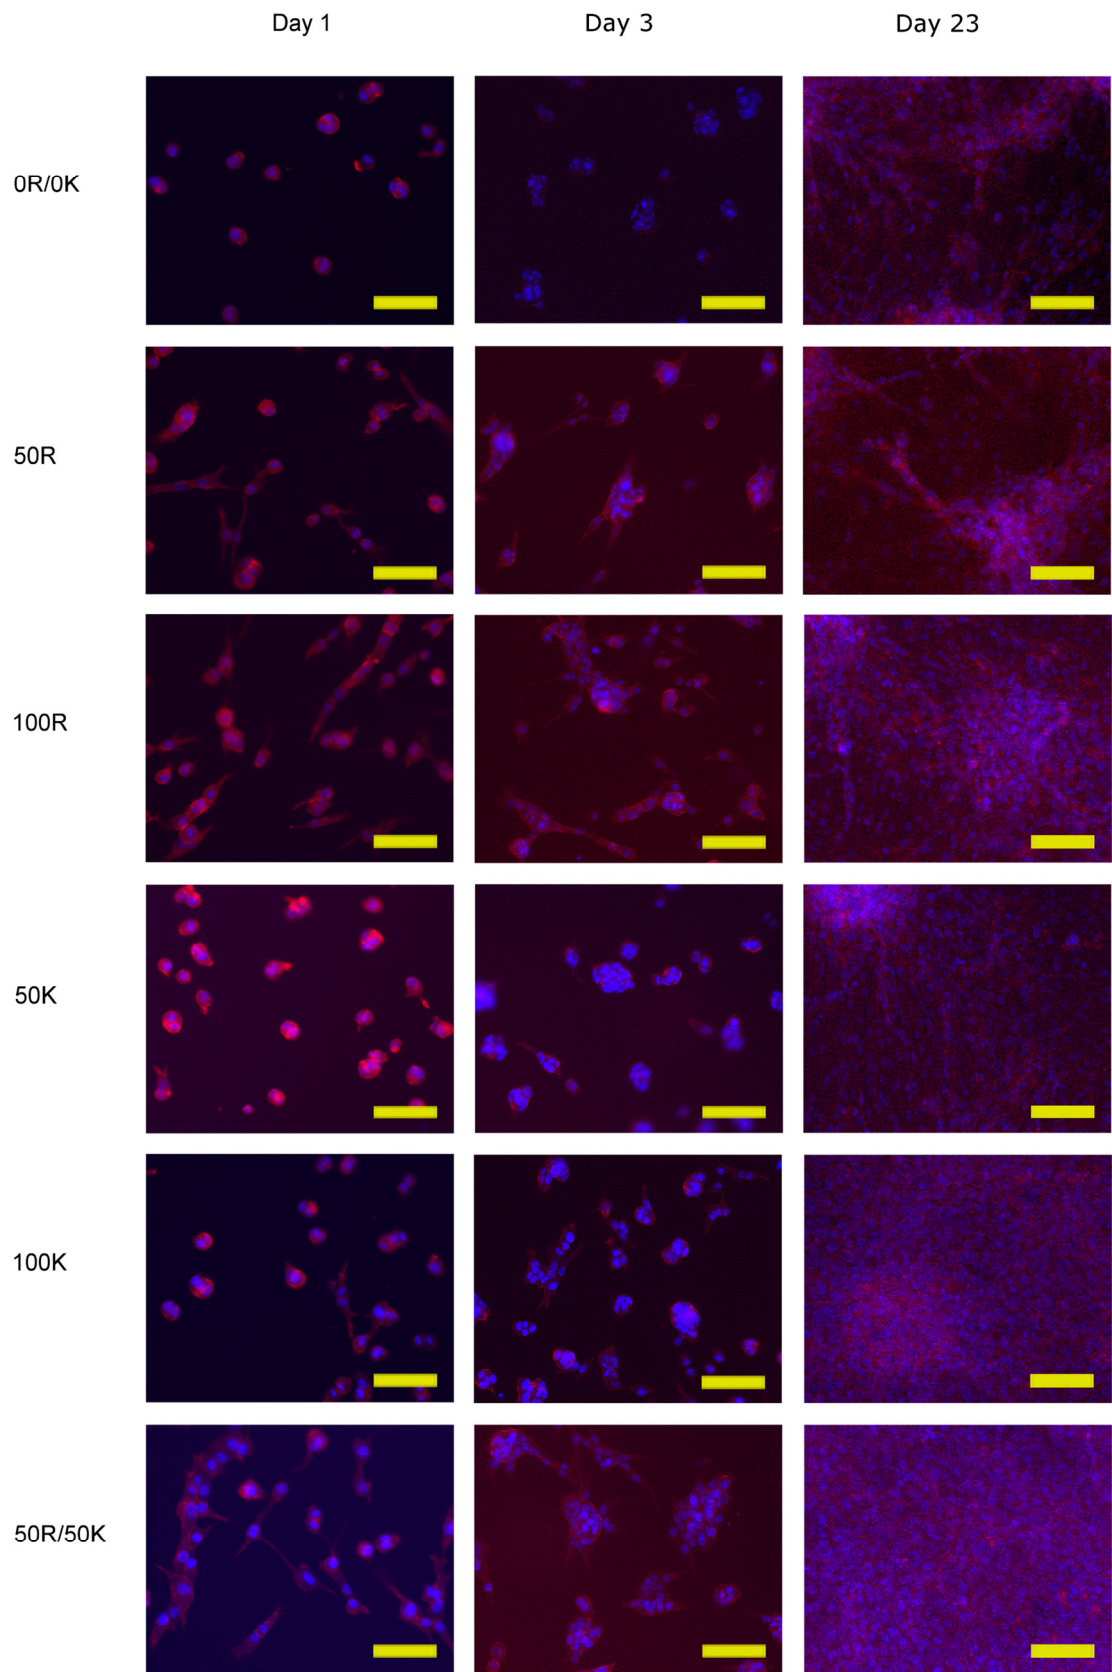

**FIGURE 2.** Cell morphology of fluorescently stained MG-63 cells on 0R/0K, 50R, 100R, 50K, 100K, and 50R/50K scaffolds after 1, 3, and 23 days of cell culture. Red: actin. Blue: nuclei. Scale bar = 100  $\mu\text{m}$ .
